# Supplementary material
Source: publisher figshare collection journal article supplement (https://rs.figshare.com/ndownloader/files/15220091)
Supplement: Supplementary file 1 [file 15220091]

## Sheet: List1
continuous variables
	n	n (%)	mean	sd	median	trimmed	mad	min	max	range	skew	kurtosis	se
age at menarche	1151	1	12.6287	1.00318	12.5833	12.6239	0.86485	9.08333	15	5.91667	0.00746669	0.0796647	0.0295693
birth weight	1148	0.997394	3215.97	453.534	3250	3230.1	370.65	950	4650	3700	-0.437709	1.15474	13.3856
equivalised family income	760	0.660295	2598.86	1112.33	2500	2509.64	790.239	454.545	12500	12045.5	2.25207	13.0151	40.3485
number of siblings	759	0.659427	1.48353	1.0624	1	1.36125	0	0	7	7	1.77354	4.76219	0.0385625
maternal age at menarche	938	0.814944	12.9019	1.28657	13	12.8737	1.4826	9	18	9	0.17684	0.250179	0.0420079
categorical variables
siblings	only full siblings		only half/step-siblings		no.siblings		half/step and full siblings		total
n	540		67		67		85		759
n (%)	0.711		0.088		0.088		0.112
father absence	no		yes		total
n	809		224		1033
n (%)	0.783		0.217
maternal education	elementary school		high school		university education		total
n	350		434		205		989
n (%)	0.354		0.439		0.207
